# Supplementary material for: The Potential of PSMA as a Vascular Target in TNBC
Source: MDPI journal article supplement (doi:10.3390/cells12040551), 2023-02-08
Supplement: s1 [file s1]

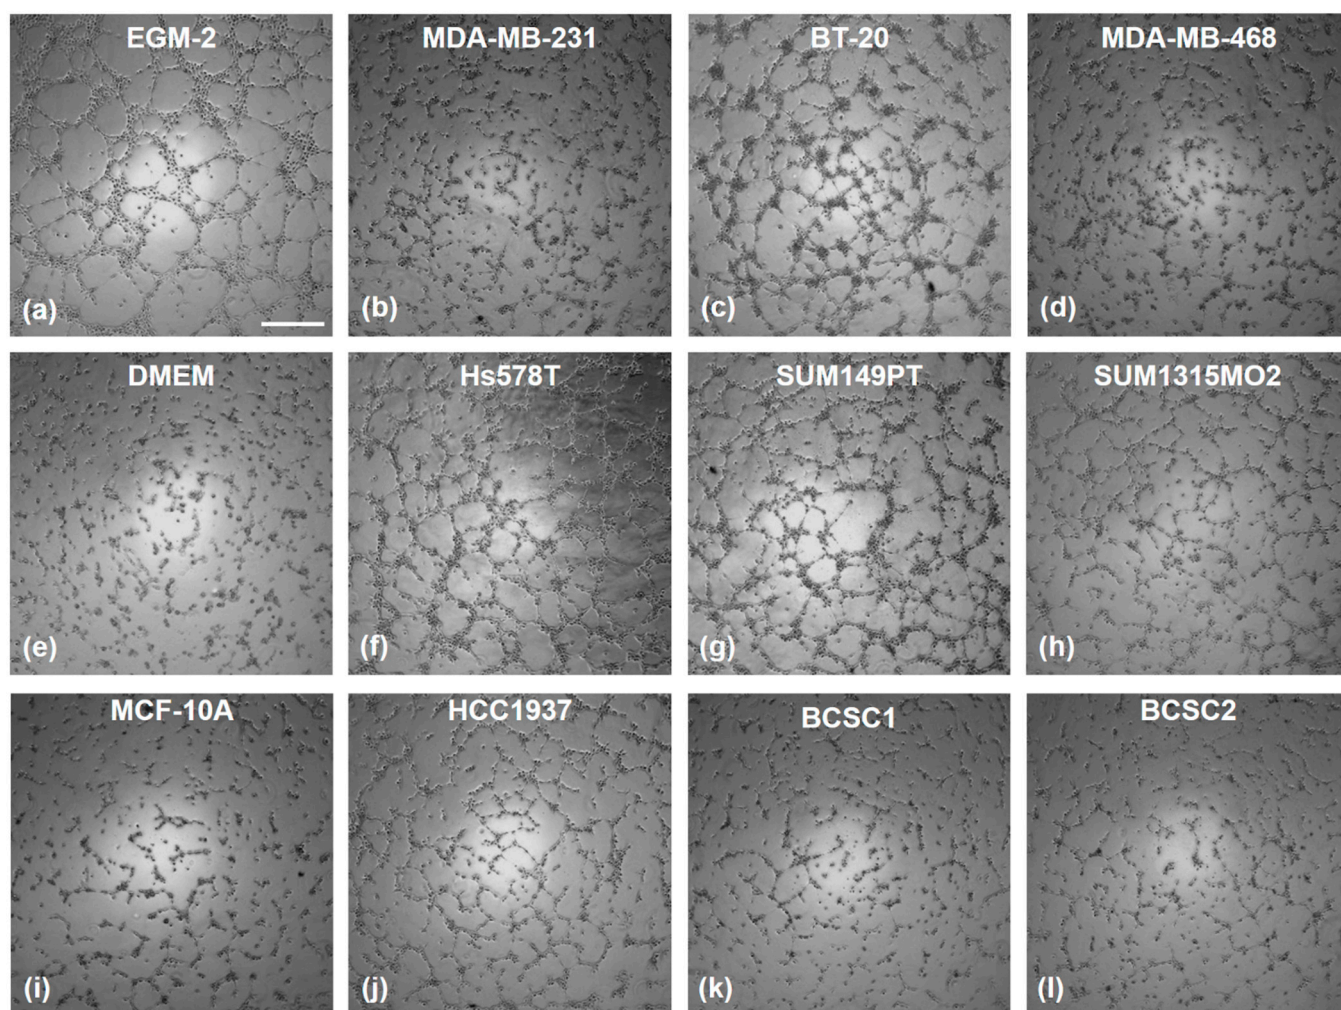

**Figure S1.** Tube formation assay in HUVEC. Phase contrast images of HUVEC tube formation incubated in the indicated TNBC TCM were acquired after 5 h. EGM-2 (+) and DMEM (-) served as control media. Scale bar: 500  $\mu$ m.

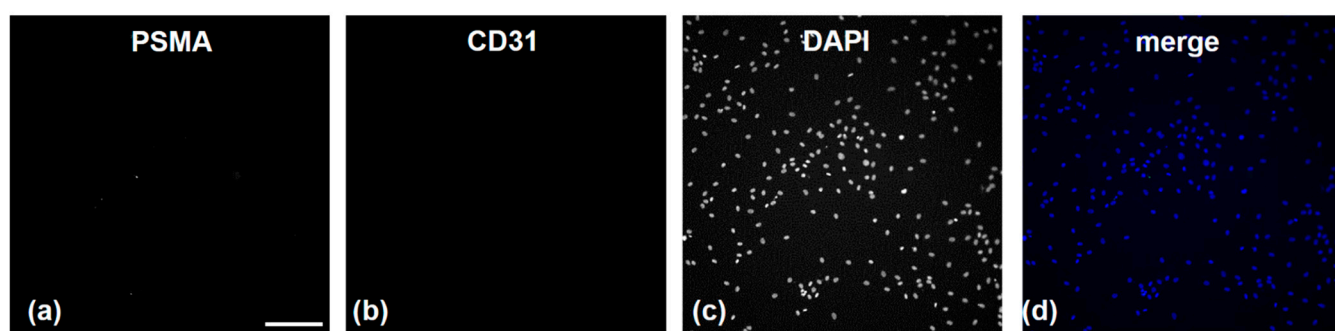

**Figure S2.** Antibody control. Secondary antibodies Alexa Fluor 488 and 555 were applied without primary antibodies to exclude unspecific binding. Nuclei were stained with DAPI. Scale bar: 200  $\mu$ m.



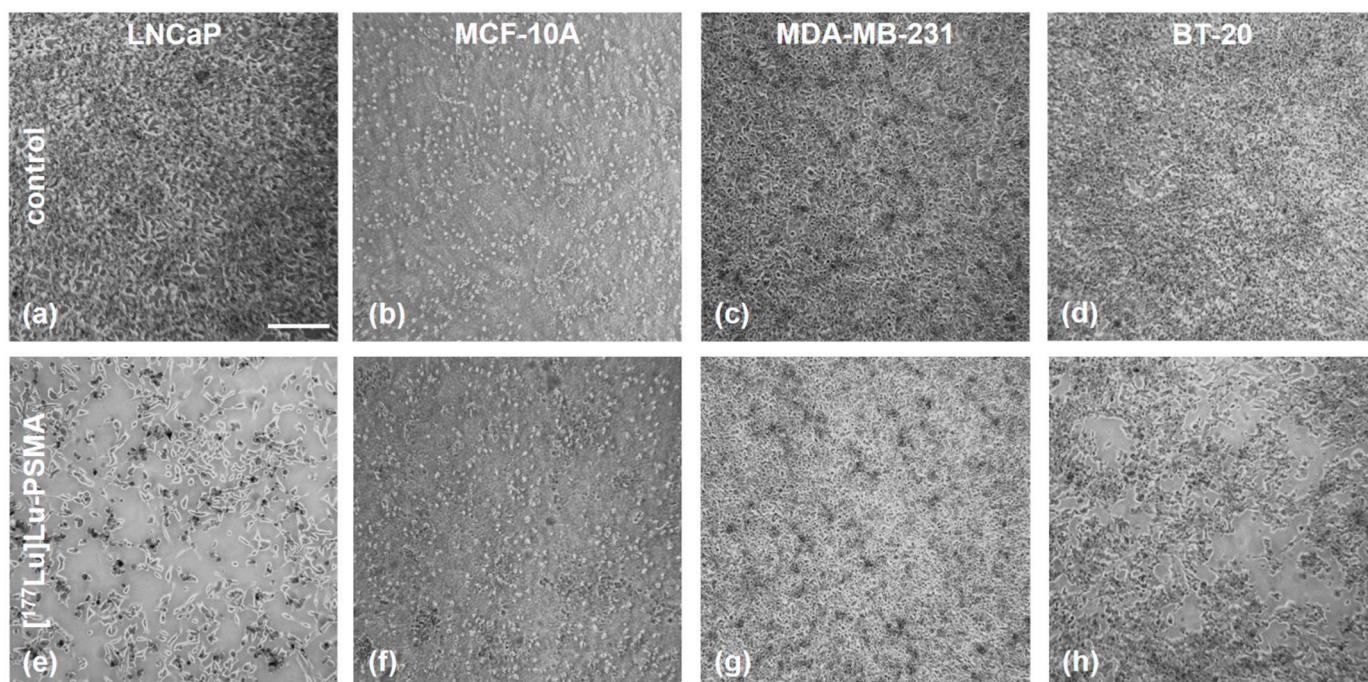

**Figure S3.** Cell viability of TNBC cells after treatment with  $[^{177}\text{Lu}]\text{Lu-PSMA}$ . Phase contrast images of the indicated cell lines were acquired subsequently before flow cytometry analysis. Scale bar: 500  $\mu\text{m}$ .

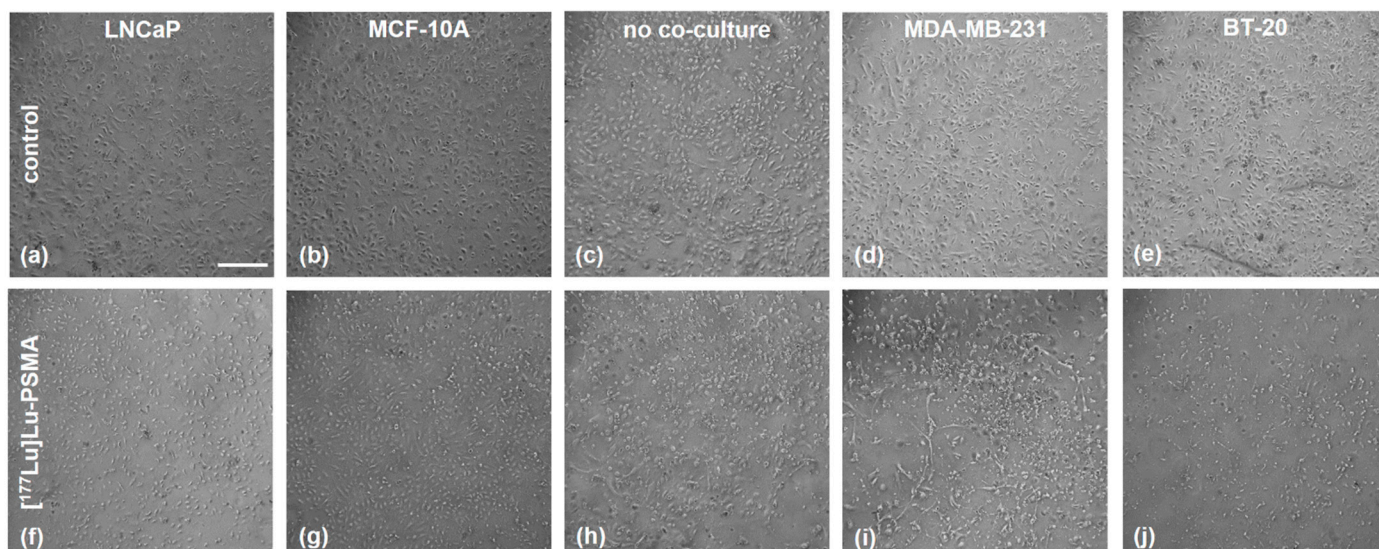

**Figure S4.** Cell viability of HUVECs co-cultured with the indicated cell lines after treatment with  $[^{177}\text{Lu}]\text{Lu-PSMA}$ . Phase contrast images of the indicated cell lines were acquired subsequently before flow cytometry analysis. Scale bar: 500  $\mu\text{m}$ .
